1 Title: "Pain in my heart": Understanding perinatal depression among women living with HIV in  
2 Malawi

3  
4 Authors: Katherine LeMasters<sup>1,2</sup>, Josée Dussault<sup>1</sup>, Clare Barrington<sup>2,3</sup>, Angela Bengtson<sup>4</sup>,  
5 Bradley Gaynes<sup>5</sup>, Vivian Go<sup>3</sup>, Mina C. Hosseinipour<sup>6,7</sup>, Kazione Kulisewa<sup>8</sup>, Anna Kutengule<sup>6</sup>,  
6 Samantha Meltzer-Brody<sup>5</sup>, Dalitso Midiani<sup>9</sup>, Steve Mphonda<sup>6</sup>, Michael Udedi<sup>8,9</sup>, Brian Pence<sup>1</sup>

7  
8 Affiliations: <sup>1</sup>Department of Epidemiology, Gillings School of Global Public Health, University  
9 of North Carolina at Chapel Hill, Chapel Hill, North Carolina; <sup>2</sup>Carolina Population Center,  
10 Chapel Hill, North Carolina; <sup>3</sup>Department of Health Behavior, Gillings School of Global Public  
11 Health, University of North Carolina at Chapel Hill, Chapel Hill, North Carolina; <sup>4</sup>Department of  
12 Epidemiology, Brown School of Public Health, Brown University, Providence, Rhode Island;  
13 <sup>5</sup>Department of Psychiatry, UNC School of Medicine, University of North Carolina at Chapel  
14 Hill, Chapel Hill, North Carolina; <sup>6</sup>UNC-Project Malawi, Lilongwe, Malawi; <sup>7</sup>Department of  
15 Medicine, UNC School of Medicine, University of North Carolina at Chapel Hill, Chapel Hill,  
16 North Carolina <sup>8</sup>College of Medicine, University of Malawi, Lilongwe, Malawi; <sup>9</sup>Ministry of  
17 Health, Lilongwe, Malawi

18

19 Abstract

20

21 Background: Perinatal depression (PND) can interfere with HIV care engagement and outcomes.  
22 We examined experiences of PND among women living with HIV (WLWH) in Malawi.

23

24 Methods: We screened 73 WLWH presenting for perinatal care in Lilongwe, Malawi using the  
25 Edinburgh Postnatal Depression Scale (EPDS). We conducted interviews with 24 women  
26 experiencing PND and analyzed data using inductive and deductive coding and narrative  
27 analysis.

28

29 Results: Women experienced a double burden of physical and mental illness, expressed as pain  
30 in one's heart. Receiving an HIV diagnosis unexpectedly during antenatal care was a key  
31 contributor to developing PND. This development was influenced by stigmatization and social  
32 support.

33

34 Conclusions: These findings highlight the need to recognize the mental health implications of  
35 routine screening for HIV and to routinely screen and treat PND among WLWH. Culturally  
36 appropriate mental health interventions are needed in settings with a high HIV burden.

37

38 Introduction

39         The scale-up of antiretroviral therapy to all pregnant and breastfeeding women living  
40 with HIV, known as Option B+, has the potential to dramatically improve maternal health and  
41 end mother-to-child HIV transmission (MTCT) (1). In Malawi, all pregnant women diagnosed  
42 with HIV in antenatal care (ANC) begin lifelong antiretroviral therapy (ART) under Option B+  
43 (2). However, women who initiate ART during pregnancy under Option B+ are one-fifth as  
44 likely to return to HIV care after their initial visit compared to non-pregnant women initiating  
45 ART in Malawi (3). Maternal mental health is likely an important factor in undermining the  
46 delivery of Option B+ by affecting initiation of and retention in HIV care, with implications for  
47 ongoing risk of MTCT and negative effects on women's quality of life and psychological well-  
48 being (4).

49         Globally, adults living with HIV are at an increased risk of depression, with the  
50 association being stronger among patients who are newly diagnosed and women (5). A  
51 systematic review conducted in high-, middle-, and low-income countries found that pregnant

52 and postpartum women living with HIV are at particularly high risk for perinatal depression  
53 (PND) due to multiple bio-psychosocial risk factors (4). These risk factors include increased  
54 stress, HIV-related stigma, a lack of social support, concerns about disclosing their HIV status,  
55 and concerns about their infant's health and HIV status (4).

56 Through Option B+, more women are becoming aware of their HIV status and initiating  
57 ART during the perinatal period. Simultaneously, many are experiencing PND. PND is known to  
58 affect 13.1% of women in low and middle-income countries, with as many as 19.2% of women  
59 having a depressive episode within the first three months postpartum (6,7). Among women living  
60 with HIV in Sub-Saharan Africa, a meta-analysis found a pooled prevalence for PND of 42.5%  
61 for prenatal women and 30.7% for postpartum women, indicating a high prevalence among this  
62 population (8).

63 PND is known to have detrimental effects on both mothers and infants (4,9). For  
64 example, behavioral traits associated with depression (i.e., neglecting ANC) can lead to adverse  
65 effects on fetal health and child development (9). Among women living with HIV, PND is also  
66 associated with increased risk for HIV progression as a function of dietary changes, impaired  
67 immune function, and suboptimal ART adherence and engagement in HIV care (10,11).

68 Given the connections between HIV, PND, and maternal and infant health, there is a  
69 great need for a fuller understanding of the PND experience of women living with HIV in low-  
70 income settings (12,13). Understanding the social etiology of PND will guide efforts to intervene  
71 on and alleviate PND among women living with HIV. Addressing PND among women living  
72 with HIV may also improve women's retention in HIV care, a global health priority, as well  
73 broader maternal and child health outcomes (14). This study aims to understand the experience  
74 of PND among women living with HIV in Malawi.

## 75 Methods

### 76 *Study Site and Population*

77           We completed in-depth interviews about PND with women seeking pre- or postnatal care  
78 at five ANC clinics (two urban and three rural) in Lilongwe, Malawi between July and August  
79 2018. All women living with HIV seeking pre- or postnatal care at the study sites who screened  
80 positive for PND and who were over the age of 18 were eligible for the study. PND was defined  
81 as depression occurring during pregnancy or the first 12 months postpartum (14,15), and was  
82 assessed using the Edinburgh Postnatal Depression Scale (EPDS), which was previously  
83 validated in Chichewa (16,17). Women were classified as having PND if they received a score of  
84  $\geq 10$  on the EPDS. Consecutive women were screened by a trained counselor at each site until  
85 four to five women with PND were identified who agreed to participate in the study. Women  
86 reporting suicidal ideation in the EPDS were referred to mental health specialists as appropriate.

### 87 *Data Instruments*

88           We developed a semi-structured interview guide to explore women's experiences of  
89 PND, its determinants and manifestations, and its impact on HIV care engagement. This guide  
90 began by presenting PND symptoms and asking if they had seen someone with these symptoms  
91 and how they would describe them, then presented vignettes, or short stories with hypothetical  
92 characters, and closed by asking women about their personal experiences with depression.  
93 Vignettes were used due to the sensitivity of the study topic (18). The vignette in the interview  
94 guide centered around a woman with a new child experiencing signs of PND and receiving an  
95 HIV diagnosis. The interviewer then asked how this woman would be treated in her community  
96 and how the woman being interviewed would handle the situation. The data collector then asked  
97 how the woman had been feeling in her most recent pregnancy and who she had confided in. The

98 guide closed with a discussion of depression treatments, namely how the woman thought those  
99 experiencing depression would be most helped. The guide was created in English and translated  
100 into Chichewa. A trained, female research assistant from Malawi conducted all interviews and  
101 met with the study team weekly to discuss the data collection process.

## 102 *Analysis*

103 All interviews were conducted and audiotaped in Chichewa, simultaneously transcribed  
104 and translated to English by AK, and uploaded to NVivo v.12 for data analysis (19). We used a  
105 combination of thematic and narrative analysis (20). Analysis and interpretation began during  
106 data collection as interviews were transcribed and translated (21). After reviewing the first few  
107 transcripts, two research assistants (KL; JD) based in the United States created a codebook to  
108 begin categorizing data that included both descriptive and interpretive codes (20). Using these  
109 descriptive and interpretive codes, the first author coded the data using a hybrid of data-driven  
110 (i.e., inductive) coding and concept-driven (i.e., deductive) coding, with concepts coming from  
111 prior literature, the research team's previous experience, and the research questions (22). The  
112 first author also analyzed words and phrases that were significant, listed their meanings, and  
113 created *in vivo* codes to capture phrases women used to describe their PND (13,22). The first  
114 author met regularly with the Malawian interviewer and translator and other members of the  
115 research team to clarify when translation was unclear, refine the codebook, and identify themes.

116 The analysis also involved creating analytic memos to document the development of the  
117 team's understanding of women's experiences of living with both PND and HIV and to identify  
118 emergent patterns and relationships between codes, which assisted in connecting the data  
119 (22,23). The first author then created matrices to identify and analyze similarities and differences  
120 between participants for key themes (24). Lastly, using narrative analysis, the first author wrote

121 an HIV diagnosis narrative based on the participant ‘Ruth.’ Because women’s stories often began  
122 with their HIV-diagnosis, a life-changing event, the narrative structure assisted in analysis by  
123 establishing chronology (20,25,26). We use the illustrative case of Ruth to highlight processes  
124 over time within one woman’s experience, as a complement to thematic summaries and quotes.

125 This study was approved by the Institutional Review Boards at the University of North  
126 Carolina at Chapel Hill and at the Malawi National Health Sciences Research Committee.

## 127 Results

### 128 *Demographic Information*

129 73 women were screened and 24 (33%) had elevated symptoms of PND. We conducted  
130 24 in-depth interviews (14 with prenatal and 10 with postpartum women with living with HIV  
131 and PND). Of the 24 with elevated symptoms of PND, 14 were pregnant and 10 were postpartum  
132 at the time of the interview (Table I). The proportion of women with PND was higher at the three  
133 rural sites (range: 45-71%) compared to the two urban sites (13-29%) (Table I). Of the 73  
134 women screened, 14 (19% of all women; 58% of those with PND) reported suicidal ideation.  
135 Report of suicidal ideation was also higher at the three rural sites (27-63% of all women) than at  
136 the urban sites (0-24% of all women).

| Clinic Site | Clinic Locale | Number Screened for PND+ | Number with PND | Number with Suicidal Ideation | Percent with PND | Percent with Suicidal Ideation |
|-------------|---------------|--------------------------|-----------------|-------------------------------|------------------|--------------------------------|
| Site A      | Urban         | 30                       | 4               | 0                             | 13%              | 0%                             |
| Site B      | Urban         | 17                       | 5               | 4                             | 29%              | 24%                            |
| Site C      | Rural         | 11                       | 5               | 3                             | 45%              | 27%                            |
| Site D      | Rural         | 7                        | 5               | 2                             | 71%              | 29%                            |
| Site E      | Rural         | 8                        | 5               | 5                             | 63%              | 63%                            |
| Total       |               | 73                       | 24              | 14                            | 33%              | 19%                            |

+ Women were screened until 4 to 5 were found to have PND at each site.

137

138 Women were, on average, 27 years old and most had more than one child, were married,  
139 unemployed, and had at least some primary education (Table II). One woman was beginning  
140 ART at the current appointment while the remainder had already initiated ART. Most women  
141 (71%) had received their HIV status over two years ago and none had been screened for or  
142 diagnosed with PND previously.

| Table II: Women's Demographic Information |           |
|-------------------------------------------|-----------|
| Women's Demographic Information           | N (%)     |
| Type of Participant                       |           |
| Prenatal Woman                            | 14 (58%)  |
| Postnatal Woman                           | 10 (42%)  |
| Age (Mean (SD))                           | 27 (5.48) |
| Pregnancy Number                          |           |
| First                                     | 3 (13%)   |
| Second                                    | 9 (38%)   |
| Third                                     | 6 (33%)   |
| Fourth                                    | 4 (17%)   |
| Fifth or more                             | 2 (8%)    |
| Marital Status                            |           |
| Married                                   | 20 (83%)  |
| Separated                                 | 2 (8%)    |
| Divorced                                  | 2 (8%)    |
| Education                                 |           |
| None                                      | 2 (8%)    |
| S1-S7                                     | 12 (50%)  |
| S8                                        | 2 (8%)    |
| Secondary or More                         | 8 (33%)   |
| Initiating ART for the first time         |           |
| Yes                                       | 1 (4%)    |
| Length Living with HIV                    |           |
| 2+ years                                  | 17 (71%)  |
| 1-2 years                                 | 1 (4%)    |
| 6 months – 1 year                         | 1 (4%)    |
| Diagnosed in last 6 months                | 5 (21%)   |

143

#### 144 *Women's Experience of PND*

145 Here we present the experiences of women living with both HIV and PND in Malawi.  
146 We highlight the narrative of one respondent, 'Ruth,' alongside others' stories to demonstrate  
147 how PND often manifests and how a woman's HIV diagnosis is a key contributor to her

148 development of PND. Ruth’s story represents a typical case, which helps provide insight into  
149 women’s PND experiences.

150 *“Pain in my heart”: a Double Burden*

151 Ruth was a pregnant participant who had received an HIV diagnosis during a past  
152 pregnancy over two years ago. When Ruth and others described how their PND presented itself  
153 in their lives, they often described their culmination of symptoms causing “pain in my heart.”  
154 When talking about her depression during her interview, Ruth said that her heart was troubled;  
155 her depression would not stop in her heart and was persisting because it had come from the  
156 combination of her HIV diagnosis, pregnancy, and marital issues. Other women used phrases  
157 referring to the heart. Women used this phrase of having pain in their hearts to describe how  
158 depression felt to them and how this feeling persisted in their heart throughout time, disrupting  
159 their lives and not allowing them to tend to other tasks. When a prenatal woman that had been  
160 diagnosed in her current pregnancy was asked if she knew about depression, she described her  
161 own experience as the following: “from the time I started my HIV treatment, I feel a lot of pain  
162 in my heart. It’s not like I am worried about anything, but I just feel so much pain in my heart, as  
163 if I have been shocked by something” (prenatal, living with HIV <6 months). This pain persisted  
164 because she did not feel that she could confide in anyone about her HIV status and because her  
165 husband had abandoned her once she disclosed her diagnosis. A woman diagnosed with HIV  
166 within the last two years said that she kept feeling an overwhelming pain in her heart that kept  
167 her from working and that this pain stemmed from her overthinking and worry. This worry was  
168 about raising her children alone, as her husband had abandoned her after she became HIV-  
169 positive. Importantly, women explained that understanding how others felt in their heart and  
170 helping other women strengthen their heart were potential mechanisms for addressing PND.



171           The persistence of women’s depression was often expressed through women’s double  
172   burden of living with both HIV and PND. This double burden was closely tied to having an  
173   unexpected HIV diagnosis, with the diagnosis making the depression harder to handle. During  
174   her interview, Ruth described the persistence of her depression and the pain in her heart as a  
175   large burden. Discussions of this double burden were most common when women were asked to  
176   imagine a woman with PND and HIV and one with only PND. HIV and PND were both thought  
177   of as diseases, one being physical and one being mental: “one of them [with only PND] is just  
178   depressed but her body is okay whereas the other one [with both PND and HIV] is depressed and  
179   her body has viruses” (prenatal, living with HIV over 2 years). All women said that living with  
180   both would be more difficult and would be different than only having PND.

181           Women also expressed that they could handle their PND more easily if it did not co-  
182   occur with HIV. As a woman’s HIV diagnosis was a key contributor to her developing PND,  
183   without this diagnosis, many women believed they would not have developed it or would have  
184   experienced a milder form. One woman stated that receiving an HIV diagnosis made her PND  
185   worse: “you get very depressed because you think of the problems you already have at home and  
186   then you have even more problems now. The depression increases” (postnatal, living with HIV  
187   over 2 years). Without an HIV diagnosis, PND was also perceived to have an endpoint whereas  
188   PND stemming from HIV was expected to be lifelong because the primary cause (i.e., their HIV  
189   status) was also lifelong.

190           Ruth and others felt that this double burden combined with stigma and marital issues led  
191   them to have suicidal thoughts, as they claimed that committing suicide would rid them of all of  
192   their problems. Fourteen out of 24 women (58%) expressed suicidal ideation and such thoughts  
193   were more common among currently pregnant women and those lacking support from their

194 partner. Of the 14 women with suicidal thoughts, nine had passive or low-risk suicidal ideation  
195 and five had active or high-risk suicidal ideation.

196 In addition to suicidal thoughts, women also revealed that their burdens could affect their  
197 ART adherence. Ruth explained that “if you are depressed, you cannot manage to do those things  
198 [take ART medication] because of the depression and you’re hurt in your heart every day,  
199 because when someone is depressed the heart always hurts. For you to be bothered about your  
200 life, you just say whatever happens will happen.” Women’s PND resulted in hopelessness, which  
201 could lead them to either forget to take their medication or to lack the motivation to go to the  
202 clinic. At the same time, Ruth said that women often think too much when they have PND, and it  
203 is harder to remember one’s medication when one has so many thoughts.

204 Yet, suicidal thoughts did not result in suicide attempts and ART barriers did not result in  
205 women’s lack of adherence to ART for Ruth and many others. High reported adherence was  
206 most common among women in urban areas and among postnatal women. Ruth was motivated to  
207 take her ART “so that the baby [she was] expecting should not go through the burden that [she  
208 was] going through” by contracting HIV. She also felt responsible for her other children and  
209 wanted to remain healthy so that she could raise them. Adherence was often made easier when  
210 women had disclosed their status to others, as they then felt accountable to those to whom they  
211 had disclosed and felt encouraged to accept their HIV status and begin and remain in treatment.

### 212 *Intersecting Identities: HIV-Positive, Pregnant, and in an Unstable Marriage*

213 Ruth had known she would be tested for HIV as part of routine ANC, but did not suspect  
214 that she had contracted HIV. In discussing her HIV diagnosis, she stated that “depression is  
215 inevitable because you have been diagnosed with HIV at a time you were not expecting it.” Ruth  
216 found it difficult to accept the reality of having HIV when she did not anticipate a diagnosis.

217 For Ruth and others that received their HIV diagnosis during pregnancy, their diagnosis  
218 compounded pre-existing anxieties about being a mother, predisposing them to develop PND.  
219 One woman in her fourth pregnancy began “wondering how [she] would be able to look after  
220 [her children] with the HIV and [kept] wondering if this was the end of [her] life” after her  
221 diagnosis (postnatal, living with HIV 1-2 years). She continually expressed her worry about her  
222 diagnosis and about how she would be able to parent while living with HIV.

223 In addition to being pregnant when receiving her diagnosis, Ruth learned that her  
224 husband was also HIV-positive but had been hiding his diagnosis from her. Upon learning of  
225 Ruth’s diagnosis, her husband acted as though she “went wayward and brought the virus into the  
226 marriage.” Like Ruth, most women were in relationships in which they believed they had  
227 contracted HIV from their husband. Yet, most women’s husbands reacted negatively to their  
228 wives’ HIV diagnosis and denied their own responsibility. Women’s HIV diagnoses combined  
229 with their pregnancy often exacerbated preexisting marital issues and created new ones. These  
230 marital issues meant that women lacked social support from a partner, contributing to them both  
231 developing PND and accelerating and exacerbating it:

232 “I sometimes do not talk to him because something is troubling me. To think the same  
233 person who transmitted the virus to me is the one who is insulting me...” (prenatal, living  
234 with HIV < 6 months).

235 For Ruth, the combination of not anticipating her HIV diagnosis, being pregnant when  
236 she received her diagnosis, and unknowingly contracting HIV from her husband resulted in her  
237 feeling overwhelmed and like her challenges were insurmountable. It was then difficult for her to  
238 accept the reality of having HIV in the midst of her overwhelming circumstances. Many other  
239 women noted an inability to accept an HIV diagnosis or a denial of their diagnosis as

240 contributing to feeling depressed. While an inability to accept a diagnosis and an active denial of  
241 a diagnosis may be different, women used these two descriptions interchangeably.

### 242 *Stigma and Social Support*

243 In addition to their marital issues, many women felt stigmatized and unsupported by  
244 others. One woman stated that “people who can encourage us to live a life with little depression  
245 are rare” (prenatal, living with HIV over 2 years). Both HIV and PND were emotionally charged  
246 topics in women’s communities and women often received mixed reactions from community  
247 members. Mixed or negative reactions largely stemmed from others not accepting women’s HIV  
248 diagnosis, meaning that they did not accept the women as their full selves with an HIV diagnosis.  
249 One woman directly linked HIV stigma to her development of depression: “I sometimes ask  
250 myself if [my community knows] about my HIV status and if that is the reason they treat me in  
251 the way they do. I then get depressed because I think too much” (postnatal, living with HIV over  
252 2 years). Women feeling stigmatized by others often led to their overthinking, which was both a  
253 cause and symptom of PND.

254 While HIV stigma was a prominent determinant of some women’s depression, others felt  
255 directly stigmatized for their depression because they felt that they were perceived as a bad  
256 mother. Women were sometimes warned that they “shouldn’t be sad, because the baby [will]  
257 also be sad” (prenatal, living with HIV over 2 years), or were described as sick, mad, in trouble,  
258 lazy, or panicked. Importantly, once women were stigmatized due to their PND, they sometimes  
259 began to worry that people were stigmatizing them due to their HIV status even if people did not  
260 know their status, which created an internal cycle of worry. Still others felt a lack of love or  
261 ambivalence towards them once people knew about their HIV or PND. Ambivalence towards

262 women in these circumstances was often as negative as active stigmatization, as women were not  
263 supported and thus unable to move towards accepting their status and lessening their PND.

264         Yet, some women found sources of support. Linked to their denial or struggle to come to  
265 terms with their HIV status, women did not immediately disclose their HIV status or feelings of  
266 depression to others. Rather, they turned to prayer. Fourteen of the 24 women listed prayer as a  
267 source of support in response to their HIV diagnosis. One woman said that she “would just pray  
268 for God to remove [her] worries because...He is the one who can remove [her] anxieties”  
269 (prenatal, living with HIV over 2 years), indicating that both she and those around her could not  
270 remove her anxieties related to her HIV.

271         After prayer, many women turned to one or two specific people for support. Ruth  
272 confided in one of her in-laws, and most women talked to a family member, friend, or their  
273 husband. While most did not find support in their husbands, four women found encouragement  
274 in talking with them, including two women who noted that their husbands were HIV-positive.  
275 Women that had been living with HIV for longer were more likely to have found sources of  
276 support. Additionally, if women knew others that were living with HIV, they were likely to serve  
277 as sources of support.

278         Throughout women’s discussions of social support, they described social support as  
279 being composed of three components: interaction, encouragement, and offloading or sharing  
280 worries. Interaction was seen as a distraction for women to stop worrying about their HIV and  
281 PND. Encouragement was discussed as both needed by women and provided by them to others  
282 so that “[they] get strengthened in [their] heart” (prenatal, living with HIV over 2 years).  
283 Encouragement thus helped their depression and their worries. Offloading was identified as a  
284 critical component for preventing suicide. Some had not found anyone that they could share their

285 worries with: “I have never met anyone whom I could share my worries with... sometimes I get  
286 depressed but can’t tell anyone” (postnatal, living with HIV over 2 years). Thus, women needed  
287 a combination of all three components of social support, as they all served different functions in  
288 alleviating PND.

## 289 Discussion

290

291 In our population, women with PND experienced a unique double burden of HIV and  
292 PND, which was commonly expressed as having pain in their hearts and as worry. Women’s  
293 HIV diagnosis, especially when it was unexpected and received during routine ANC, was a key  
294 contributor to their developing PND. Women’s unexpected diagnosis intersected with their  
295 pregnancy and marital relationships to contribute to their PND. These relationships were then  
296 influenced, positively or negatively, by women’s social interactions and relationships.

297 Our study sheds light on the experience of women living with both PND and HIV in a  
298 low-income country with high HIV prevalence. Three main themes emerged from our  
299 interviews: a double burden of having a physical and mental illness, as expressed through having  
300 pain in one’s heart; women’s intersecting identities of being HIV-positive, pregnant, and in an  
301 unstable marriage; and the key roles of stigmatization and social support (or lack thereof) in  
302 influencing the development and trajectory of PND.

303 First, given the many contributing factors to women’s PND, it is not surprising that  
304 women would experience a large burden. Yet, while the co-occurrence of HIV and depression is  
305 often cited in the literature about this population, there is a lack of discussion around what this  
306 co-occurrence means for women’s experiences and the burden it creates (4,27–29). This finding  
307 reemphasizes that these two epidemics often collide in the lives of women and their intersection  
308 deserves global attention through increased screening and treatment (14).

309           Second, the high interconnection of contributors to PND is supported in other qualitative  
310 work (13). Women’s HIV diagnosis has been noted as a source of depression in prior literature in  
311 sub-Saharan Africa, with women reporting a 3.5-fold higher number of mental health issues,  
312 especially depression, after an HIV diagnosis (27,28). We add to this literature by finding this  
313 HIV diagnosis to be particularly burdensome when it is not expected and is diagnosed during  
314 routine ANC. Research from South Africa found that if women are living with HIV, women’s  
315 PND is worse because women are worried about having children to look after while living with  
316 HIV (13). The role of a woman’s marriage was quite prominent in our data. Based on our data, it  
317 is possible that women living with HIV and experiencing PND may, in particular, lack support  
318 from their partner. Another study in Lilongwe, Malawi found that women that had not disclosed  
319 their HIV status to their partner had twice the prevalence of PND, which likely indicates a poor  
320 relationship with and emotional support from a partner (13,30). Thus, women’s marriage may  
321 relate to their depression specifically among HIV-positive women, as HIV women’s HIV status  
322 may indicate a lack of ability to have previously negotiated condom use with a partner and a lack  
323 of emotional support within marriage (31).

324           Third, women’s stigma related to HIV and PND cut across all of their identities  
325 mentioned above (31,32). Most prior work focuses on HIV-related stigma specifically and finds  
326 that women reporting greater stigma related to HIV in Malawi are significantly more likely to  
327 report depression (32). This indicates that in addition to women having an unexpected HIV  
328 diagnosis, HIV may contribute to PND through stigma. A study in South Africa found that the  
329 relationship between stigma and HIV among HIV-positive women persists after controlling for  
330 marital status and pregnancy intention, indicating that it is a distinctly important component of  
331 women’s identities contributing to PND (33). Stigma related to depression plays a role as well.

332 One study in South Africa found that psychological or emotional illnesses, including depression,  
333 hold an additional layer of stigma and increase stress and perceived stigma upon disclosure of  
334 status (34). Yet, this work was not specific to PND (34). While we found depression-related  
335 stigma to be present, we argue that there is unique stigma related to PND, as women were  
336 worried about being perceived as a bad mother due to their depression. Additionally, while the  
337 literature documents well how stigma affects depression, it is less well understood how  
338 ambivalence or a lack of support can be a contributing factor. Multiple women did not mention  
339 overt stigma, but indicated that ambivalence and a lack of support also contributed to their PND.

340       Regarding the association between PND and HIV, most literature reports that depression  
341 is associated with lower ART adherence, which often serves as the motivation for why PND  
342 should be addressed among HIV-positive women. Yet, while the women in our study said that  
343 other depressed women may not adhere to ART, most claimed that they did not have issues with  
344 adherence themselves. It is possible that the women choosing to participate in our interviews  
345 were more likely to be those well engaged in care; it is also possible the women felt some social  
346 desirability pressure to report good adherence for themselves, while feeling more free to note  
347 that others might have such a difficulty. One explanation, as noted by another study in  
348 Lilongwe, Malawi is that because these women are in a population with high engagement in  
349 care, PND is not associated with lower ART adherence (35). Another explanation our study  
350 found is that during this perinatal period, women may be more motivated to adhere to ART as  
351 they want to have a healthy pregnancy and remain healthy for raising their children. It is  
352 important to note this motivating factor, as it may be protective in women's ART retention  
353 during the perinatal period.

354 *Recommendations*



355 Moving forward, literature suggesting that HIV and depression care should be combined  
356 in treatment and that providers should attend to the emotional and psychological needs of women  
357 need to be transferred to the perinatal population and expand beyond ART counseling (28,32).  
358 Additionally, examples exist that address PND at the community level using pre-existing  
359 primary care structures and training lay health workers in counseling (36–38). Given that HIV-  
360 infected women often experience a double burden of physical and mental illness that is  
361 influenced by social support, stigmatization, and family dynamics, these interventions have the  
362 possibility of being expanded and adapted to women living with HIV. Specifically, the  
363 Friendship Bench, individual talking therapy based on problem-solving therapy delivered by a  
364 lay health worker, has been found to be effective in Zimbabwe among a general population  
365 suffering from depression, the majority of whom were living with HIV (37). Importantly, the  
366 Friendship Bench and similar interventions draw on pre-existing structures of primary care and  
367 ART counseling services and train lay health workers, indicating that they are scalable given the  
368 high proportion of women living with HIV that also have PND. Additionally, they focus on  
369 counseling and providing social support, which is often a critically missing piece of women’s  
370 current experiences.

### 371 *Limitations*

372 Our findings should be considered in the context of certain limitations. First, while the  
373 use of vignettes is an appropriate strategy for discussing sensitive topics, it creates difficulty in  
374 disentangling women’s personal experiences from their perceptions of others’ experiences.  
375 Second, the data was translated directly into English from an audio-recording in Chichewa,  
376 which may result in inconsistencies in translation. However, the translator was an active member  
377 of the research team and was available for discussion, which aided immensely in data analysis

378 and interpretation.(39) Third, it is possible that there was social desirability bias in discussing  
379 ART adherence. Lastly, we have limited generalizability, as we only spoke with women engaged  
380 in ART and with women that were willing to talk about their PND from five clinics in Malawi.  
381 However, our five sites do capture a diverse patient population and all women that screened  
382 positively for PND agreed to be interviewed.

### 383 Conclusions

384 By improving our understanding of the social etiology of PND among women living with  
385 HIV, we will be better able to construct interventions that are specifically designed for women  
386 living with both PND and HIV and that are responsive to the experiences of women.(13) In  
387 conclusion, our findings indicate a great need for programs to recognize and address the mental  
388 health issues during routine HIV testing and ART treatment and the importance of recognizing  
389 women's whole identities and experiences in assessing the burden of PND in this population.

390 Acknowledgments

391 This research was supported by grant R34 MH 116806 and R00 MH 112413 from the National Institute  
392 of Mental health (NIMH) and by a developmental grant from the UNC Center for AIDS Research  
393 (CFAR), an NIH-funded program (P30 AI 050410). This paper does not reflect the views of the NIMH  
394 or NIH.

395

396

397

Bibliography

- 398 1. Luzuriaga K, Mofenson LM. Challenges in the Elimination of Pediatric HIV-1 Infection.  
399 N Engl J Med [Internet]. 2016;374(8):761–70. Available from:  
400 <http://www.nejm.org/doi/10.1056/NEJMra1505256>
- 401 2. The World Health Organization. Programmatic update: Use of Antiretroviral Drugs for  
402 Treating Pregnant Women and Preventing HIV Infection in Infants [Internet]. Geneva;  
403 2012. Available from: [http://www.who.int/hiv/PMTCT\\_update.pdf](http://www.who.int/hiv/PMTCT_update.pdf)
- 404 3. Tenthani L, Haas A, Tweya H, Jahn A, Oosterhout J, Chimbandira F, et al. Retention in  
405 care under universal Antiretroviral Therapy for HIV Infected Pregnant and Breastfeeding  
406 Women (“Option B+”) in Malawi. AIDS. 2014;28(4):589–98.
- 407 4. Kapetanovic S, Dass-Brailsford P, Nora D, Talisman N. Mental Health of HIV-  
408 Seropositive Women During Pregnancy and Postpartum Period: A Comprehensive  
409 Literature Review. AIDS Behav [Internet]. 2014 Jun;18(6):1152–73. Available from:  
410 <https://doi.org/10.1007/s10461-014-0728-9>
- 411 5. Bhatia R, Hartman C, Kallen MA, Graham J, Giordano TP. Persons Newly Diagnosed  
412 with HIV Infection are at High Risk for Depression and Poor Linkage to Care: Results  
413 from the Steps Study. AIDS Behav [Internet]. 2011 Aug;15(6):1161–70. Available from:  
414 <https://doi.org/10.1007/s10461-010-9778-9>
- 415 6. Woody CA, Ferrari AJ, Siskind DJ, Whiteford HA, Harris MG. A systematic review and  
416 meta-regression of the prevalence and incidence of perinatal depression. J Affect Disord  
417 [Internet]. 2017;219(May):86–92. Available from:  
418 <http://dx.doi.org/10.1016/j.jad.2017.05.003>
- 419 7. Gavin NI, Gaynes BN, Lohr KN, Meltzer-Brody S, Gartlehner G, Swinson T. Perinatal  
420 Depression: A Systematic Review of Prevalence and Incidence. Obstet Gynecol [Internet].  
421 2005;106(5). Available from:  
422 [https://journals.lww.com/greenjournal/Fulltext/2005/11000/Perinatal\\_Depression\\_\\_A\\_Systematic\\_Review\\_of.27.aspx](https://journals.lww.com/greenjournal/Fulltext/2005/11000/Perinatal_Depression__A_Systematic_Review_of.27.aspx)
- 423
- 424 8. Sowa NA, Cholera R, Pence B, Gaynes B. Perinatal depression in HIV-infected African  
425 women: a systematic review. J Clin Psychiatry. 2010;76(10):1385–96.
- 426 9. Accortt EE, Cheadle ACD, Dunkel Schetter C. Prenatal Depression and Adverse Birth  
427 Outcomes: An Updated Systematic Review. Matern Child Health J [Internet]. 2015  
428 Jun;19(6):1306–37. Available from: <https://doi.org/10.1007/s10995-014-1637-2>
- 429 10. Antelman G, Kaaya S, Wei R, Mbwambo J, Msamanga GI, Fawzi WW, et al. Depressive  
430 Symptoms Increase Risk of HIV Disease Progression and Mortality Among Women in  
431 Tanzania. JAIDS J Acquir Immune Defic Syndr [Internet]. 2007;44(4). Available from:  
432 [https://journals.lww.com/jaids/Fulltext/2007/04010/Depressive\\_Symptoms\\_Increase\\_Risk\\_of\\_HIV\\_Disease.15.aspx](https://journals.lww.com/jaids/Fulltext/2007/04010/Depressive_Symptoms_Increase_Risk_of_HIV_Disease.15.aspx)
- 433
- 434 11. Ickovics D, Hamburger M, Vlahov D, Shoenbaum E, Boland R, Moore J. Mortality, CD4  
435 Cell Count Decline, and Depressive Symptoms Among HIV-Seropositive Women.  
436 2001;285(11):1466–74.

- 437 12. Dow A, Dube Q, Pence BW, Van Rie A. Postpartum Depression and HIV Infection  
438 among Women in Malawi. *J Acquir Immune Defic Syndr*. 2014;65(3):359–65.
- 439 13. Davies T, Schneider M, Nyatsanza M, Lund C. “The sun has set even though it is  
440 morning”: Experiences and explanations of perinatal depression in an urban township,  
441 Cape Town. *Transcult Psychiatry*. 2016;53(3):286–312.
- 442 14. Stringer EM. Depression, pregnancy, and HIV: the case to strengthen mental health  
443 services for pregnant and post-partum women in sub-Saharan Africa. *The Lancet*  
444 *Psychiatry*. 2014;1(2):159–62.
- 445 15. O’Hara MW, Wisner KL. Perinatal mental illness: Definition, description and aetiology.  
446 *Best Pract Res Clin Obstet Gynaecol* [Internet]. 2014;28(1):3–12. Available from:  
447 <http://dx.doi.org/10.1016/j.bpobgyn.2013.09.002>
- 448 16. Stewart RC, Umar E, Tomenson B, Creed F. Validation of screening tools for antenatal  
449 depression in Malawi-A comparison of the Edinburgh postnatal depression scale and self  
450 reporting questionnaire. *J Affect Disord* [Internet]. 2013;150(3):1041–7. Available from:  
451 <http://dx.doi.org/10.1016/j.jad.2013.05.036>
- 452 17. Bek Cox J, JM H, Sagovsky R. Detection of postnatal depression. Development of the 10-  
453 item Edinburgh Postnatal Depression Scale. *Br J Psychiatry*. 1987;150:191–5.
- 454 18. Atif N, Lovell K, Husain N, Sikander S, Patel V, Rahman A. Barefoot therapists: Barriers  
455 and facilitators to delivering maternal mental health care through peer volunteers in  
456 Pakistan: A qualitative study. *Int J Ment Health Syst*. 2016;10(1):1–12.
- 457 19. NVivo qualitative data analysis Software. QSR International Pty Ltd.; 2018.
- 458 20. Maxwell J, Miller B. Categorizing and Connecting Strategies in Qualitative Data  
459 Analysis. *Handb Emergent Methods* [Internet]. 2008;461–77. Available from:  
460 [https://books.google.com/books/about/Handbook\\_of\\_Emergent\\_Methods.html?id=vbyxB](https://books.google.com/books/about/Handbook_of_Emergent_Methods.html?id=vbyxBkkjFeYC&pgis=1)  
461 [kkjFeYC&pgis=1](https://books.google.com/books/about/Handbook_of_Emergent_Methods.html?id=vbyxBkkjFeYC&pgis=1)
- 462 21. Sandelowski M. Qualitative analysis: What it is and how to begin. *Res Nurs Health*  
463 [Internet]. 1995;18(4):371–5. Available from:  
464 <http://doi.wiley.com/10.1002/nur.4770180411>
- 465 22. Gibbs G. Thematic coding and categorizing. In: *Analyzing Qualitative Data*. Thousand  
466 Oaks: Sage; 2013. p. 38–56.
- 467 23. Saldaña J. Writing Analytic Memos. In: *The Coding Manual for Qualitative Researchers*.  
468 Thousand Oaks: Sage; 2014. p. 32–44.
- 469 24. Miles MB, Huberman AM. Matrix Displays: Some Rules of Thumb. In: *Qualitative Data*  
470 *Analysis*. Second. Thousand Oaks: Sage; 1994.
- 471 25. Riessman C. Thematic Analysis. In: *Narrative Methods for the Human Sciences*.  
472 Thousand Oaks: Sage; 2008. p. 53–76.
- 473 26. Gibbs G. Analyzing biographies and narratives. In: *Analyzing Qualitative Data* [Internet].  
474 Thousand Oaks: Sage; 2007. p. 56–72. Available from:  
475 [https://ares.lib.unc.edu/ares/ares.dll?SessionID=P114246473M&Action=10&Type=10&V](https://ares.lib.unc.edu/ares/ares.dll?SessionID=P114246473M&Action=10&Type=10&Value=109050108)  
476 [alue=109050108](https://ares.lib.unc.edu/ares/ares.dll?SessionID=P114246473M&Action=10&Type=10&Value=109050108)
- 477 27. Kagee A, Martin L. Symptoms of depression and anxiety among a sample of South  
478 African patients living with HIV. *AIDS Care*. 2010;22(2):159–65.
- 479 28. Orza L, Bewley S, Logie CH, Crone ET, Moroz S, Strachan S, et al. How does living with  
480 HIV impact on women’s mental health? Voices from a global survey. *J Int AIDS Soc*.  
481 2015;18(Suppl 5):1–9.
- 482 29. Bhatia R, Hartman C, Kallen MA, Graham J, Giordano TP. Persons Newly Diagnosed

- 483 with HIV Infection are at High Risk for Depression and Poor Linkage to Care: Results  
484 from the Steps Study. 2011;15(6):1161–70.
- 485 30. Harrington BJ, Pence BW, John M, Melhado C, Phulusa J, Mthiko B, et al. Prevalence  
486 and factors associated with antenatal depressive symptoms among women enrolled in  
487 Option B+ antenatal HIV care in Malawi: a cross-sectional analysis. *J Ment Heal*. 2018;  
488 31. Kidia K, Machando D, Bere T, Macpherson K, Nyamayaro P, Potter L, et al. “I was  
489 thinking too much”: Experiences of HIV-positive adults with common mental disorders  
490 and poor adherence to antiretroviral therapy in Zimbabwe. *Trop Med Int Heal*.  
491 2015;20(7):903–13.
- 492 32. Kamen C, Arganbright J, Kienitz E, Weller M, Khaylis A, Shenkman T, et al. HIV-related  
493 stigma: implications for symptoms of anxiety and depression among Malawian women.  
494 *African J AIDS Res*. 2015;14(1):67–73.
- 495 33. Brittain K, Mellins CA, Phillips T, Zerbe A, Abrams EJ, Myer L, et al. Social support,  
496 stigma and antenatal depression among HIV- infected pregnant women in South Africa.  
497 *AIDS Behav*. 2018;21(1):274–82.
- 498 34. Sorsdahl K, Mall S, Stein D, Joska J. Sorsdahl\_2010.pdf. *AIDS Care*. 2010;22(11):1418–  
499 27.
- 500 35. Harrington BJ, Pence BW, Maliwichi M, Jumbe A, Gondwe N, Wallie S, et al. Probable  
501 antenatal depression at antiretroviral initiation and postpartum viral suppression and  
502 engagement in Option B+. *AIDS*. 2018;
- 503 36. Honikman S, van Heyningen T, Field S, Baron E, Tomlinson M. Stepped care for  
504 maternal mental health: A case study of the perinatal mental health project in South  
505 Africa. *PLoS Med*. 2012;9(5).
- 506 37. Chibanda D, Mesu P, Kajawu L, Cowan F, Araya R, Abas MA. Problem-solving therapy  
507 for depression and common mental disorders in Zimbabwe: Piloting a task-shifting  
508 primary mental health care intervention in a population with a high prevalence of people  
509 living with HIV. *BMC Public Health*. 2011;11:1–10.
- 510 38. Malqvist M, Clarke K, Matsebula T, Bergman M, Tomlinson M. Screening for antepartum  
511 depression through community health outreach in Swaziland. *J Community Health*.  
512 2016;41(5):946–52.
- 513 39. Wong JPH, Poon MKL. Bringing Translation Out of the Shadows: Translation as an Issue  
514 of Methodological Significance in Cross-Cultural Qualitative Research. *J Transcult Nurs*.  
515 2010;21(2):151–8.  
516
